# Supplementary material
Source: Springer Nature journal article supplement (https://www.springermedizin.de/resource/supplementary/12889_2011_3567_MOESM2_ESM.pdf/9489368)

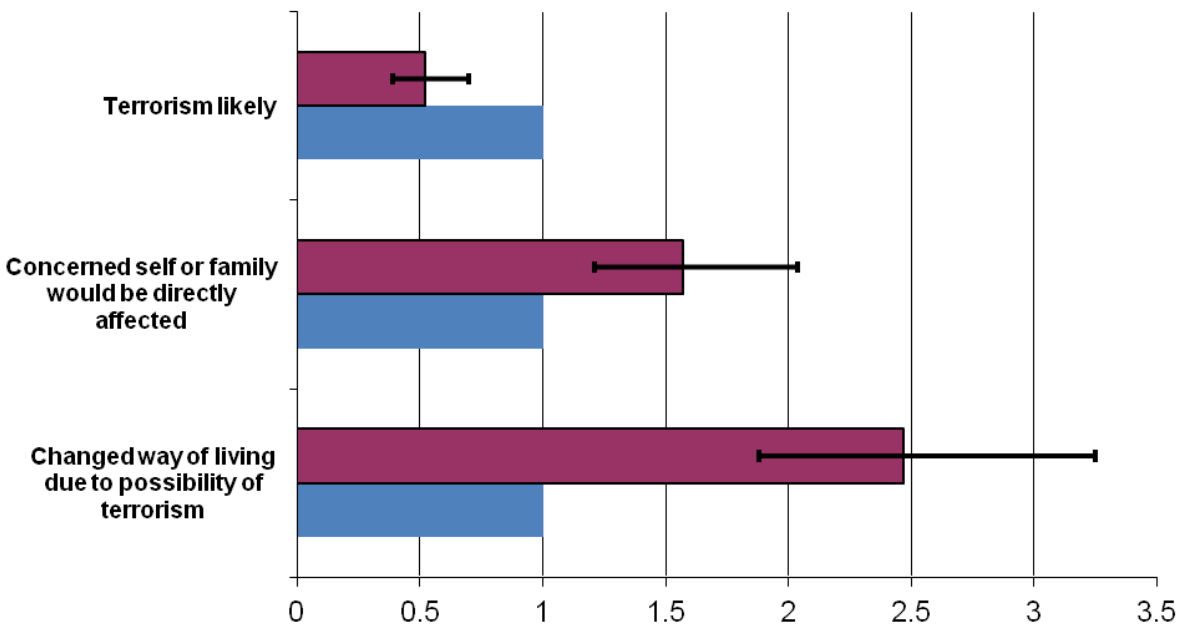

Adjusted Odd Ratios (AOR)

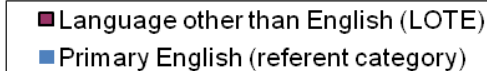

Supplement: MOESM2 [file 9489368]
